# Supplementary material
Source: PubMed Central journal article supplement (PMC6868468)
Supplement: DB180290SupplementaryData.pdf [file DB180290SupplementaryData.pdf]

SUPPLEMENTARY DATA

**Supplementary Table S1. Summary of DNA methylation array data generation and processing across the cohorts**

| <b>Cohort</b>            | <b>EPIC-Norfolk</b>                                                                      | <b>LOLIPOP</b>                                                                                                                                                                                    | <b>FHS</b>                                                                                                  |
|--------------------------|------------------------------------------------------------------------------------------|---------------------------------------------------------------------------------------------------------------------------------------------------------------------------------------------------|-------------------------------------------------------------------------------------------------------------|
| <b>Sample size</b>       | 1264                                                                                     | 1,074 (incident T2DM)/ 1,590 (controls)                                                                                                                                                           | 2741                                                                                                        |
| <b>DNA source</b>        | whole blood                                                                              | whole blood                                                                                                                                                                                       | whole blood                                                                                                 |
| <b>Methylation array</b> | Illumina HM450k                                                                          | Illumina HM450k                                                                                                                                                                                   | Illumina HM450k                                                                                             |
| <b>normalisation</b>     | quantile normalisation                                                                   | quantile normalisation                                                                                                                                                                            | DASEN                                                                                                       |
| <b>QC method</b>         | Ref. 17                                                                                  | Ref. 17                                                                                                                                                                                           | Ref. 19                                                                                                     |
| <b>Statistical model</b> | T2DM status ~ methylation + age + sex + estimated white blood cell counts + sample plate | T2DM status ~ methylation + control probes + bisulfite conversion batch + measured white blood cells + imputed white blood cell subsets + 5 PCA (corrected for genomic control inflation factor). | Methylation ~ T2DM status + age + sex + white blood cell counts + technical covariates + batch effects +BMI |

SUPPLEMENTARY DATA

**Supplementary Table S2. Confirmation in EPIC-Norfolk of the 5 MVPs with consistent associations with incident T2DM reported by Chambers *et al.* (2015)**

\*These additional two MVPs were reportedly not significantly associated ( $P > 0.05$ ) with T2DM in their European replication samples. MVPs with confirmed association  $P < 7.1E-03$  ( $=0.05/7$ ) are highlighted.

| CpG                                       | Chr | Position  | Gene(s)         | Chambers et al. 2015 |                   |                  |               | EPIC-Norfolk Study |             |         |
|-------------------------------------------|-----|-----------|-----------------|----------------------|-------------------|------------------|---------------|--------------------|-------------|---------|
|                                           |     |           |                 | RR (Indian Asians)   | P (Indian Asians) | RR (Europeans)   | P (Europeans) | OR                 | CI 95%      | P       |
| cg19693031                                | 1   | 145441552 | <i>TXNIP</i>    | 0.92 (0.91–0.94)     | 1.0E-13           | 0.96 (0.94–0.98) | 2.50E-05      | 0.524              | [0.46-0.6]  | 2.7E-21 |
| cg06500161                                | 21  | 43656587  | <i>ABCG1</i>    | 1.08 (1.06–1.10)     | 2.2E-13           | 1.04 (1.02–1.06) | 1.2E-04       | 1.655              | [1.45-1.89] | 6.4E-14 |
| cg11024682                                | 17  | 17730094  | <i>SREBF1</i>   | 1.06 (1.04–1.08)     | 8.4E-09           | 1.03 (0.95–0.99) | 5.4E-03       | 1.556              | [1.35-1.79] | 6.0E-10 |
| cg02650017                                | 17  | 47301614  | <i>PHOSPHO1</i> | 0.94 (0.92–0.96)     | 2.1E-09           | 0.97 (0.95–0.99) | 1.2E-03       | 0.863              | [0.76-0.97] | 1.8E-02 |
| cg18181703                                | 17  | 76354621  | <i>SOCS3</i>    | 0.95 (0.93–0.97)     | 2.1E-07           | 0.97 (0.95–0.99) | 1.6E-03       | 0.909              | [0.81-1.02] | 1.2E-01 |
| <i>Reported inconsistent associations</i> |     |           |                 |                      |                   |                  |               |                    |             |         |
| * cg04999691                              | 7   | 150027050 | <i>C7orf29</i>  | 0.95 (0.93–0.96)     | 1.4E-08           | 1.00 (0.98–1.02) | 7.1E-01       | 0.999              | [0.88-1.14] | 9.9E-01 |
| * cg09152259                              | 2   | 128156114 | <i>PROC</i>     | 0.95 (0.93–0.97)     | 9.3E-08           | 0.99 (0.97–1.01) | 3.2E-01       | 0.799              | [0.71-0.91] | 4.2E-04 |

SUPPLEMENTARY DATA

**Supplementary Table S3. Conditional models for the top 18 MVPs associated with incident T2DM - adjusted for baseline BMI (B), HbA1c (C), BMI & HbA1c (D), in the EPIC-Norfolk study**

Model A: adjusted for age, sex, estimated cell counts and technical covariates (Discovery).

Model B: model A + adjustment for baseline BMI.

Model C: model A + adjustment for baseline HbA1c.

Model D: model A + adjustment for baseline HbA1c and BMI.

OR: Odds Ratio per +1 SD in normalised methylation intensity; CI 95%: 95% Confidence Interval; Attentn: % Attenuation in the odds ratio from Model A.

| CpG ID     | Chr | Position  | Gene            | Model A |             |         | Model B (n=1260) |             |         |          | Model C (n=1262) |             |         |          | Model D (n=1256) |             |         |          |
|------------|-----|-----------|-----------------|---------|-------------|---------|------------------|-------------|---------|----------|------------------|-------------|---------|----------|------------------|-------------|---------|----------|
|            |     |           |                 | OR      | CI 95%      | P-value | OR               | CI 95%      | P-value | Attentn. | OR               | CI 95%      | P-value | Attentn. | OR               | CI 95%      | P-value | Attentn. |
| cg19693031 | 1   | 144152909 | <i>TXNIP</i>    | 0.52    | [0.46-0.6]  | 2.7E-21 | 0.55             | [0.47-0.63] | 2.5E-16 | 5%       | 0.68             | [0.57-0.81] | 8.5E-06 | 33%      | 0.68             | [0.57-0.81] | 1.9E-05 | 33%      |
| cg06500161 | 21  | 42529656  | <i>ABCG1</i>    | 1.65    | [1.45-1.89] | 6.4E-14 | 1.47             | [1.27-1.69] | 1.2E-07 | 29%      | 1.48             | [1.25-1.75] | 4.5E-06 | 26%      | 1.36             | [1.13-1.62] | 8.0E-04 | 46%      |
| cg14476101 | 1   | 120057515 | <i>PHGDH</i>    | 0.67    | [0.59-0.76] | 2.8E-10 | 0.78             | [0.68-0.9]  | 4.4E-04 | 35%      | 0.68             | [0.58-0.8]  | 4.1E-06 | 5%       | 0.76             | [0.64-0.91] | 1.9E-03 | 29%      |
| cg14020176 | 17  | 70276580  | <i>SLC9A3R1</i> | 1.63    | [1.4-1.9]   | 3.3E-10 | 1.48             | [1.26-1.75] | 3.6E-06 | 24%      | 1.36             | [1.11-1.65] | 2.4E-03 | 44%      | 1.26             | [1.02-1.55] | 3.1E-02 | 59%      |
| cg11024682 | 17  | 17670819  | <i>SREBF1</i>   | 1.56    | [1.35-1.79] | 6.0E-10 | 1.43             | [1.23-1.67] | 3.4E-06 | 22%      | 1.31             | [1.08-1.57] | 4.7E-03 | 45%      | 1.25             | [1.03-1.52] | 2.4E-02 | 55%      |
| cg06397161 | 22  | 38090005  | <i>SYNGR1</i>   | 1.51    | [1.32-1.73] | 4.5E-09 | 1.44             | [1.23-1.68] | 3.3E-06 | 14%      | 1.30             | [1.09-1.56] | 4.4E-03 | 41%      | 1.26             | [1.04-1.53] | 1.6E-02 | 49%      |
| cg00574958 | 11  | 68364198  | <i>CPT1A</i>    | 0.69    | [0.61-0.78] | 5.2E-09 | 0.79             | [0.69-0.9]  | 5.5E-04 | 31%      | 0.73             | [0.63-0.86] | 1.0E-04 | 14%      | 0.81             | [0.69-0.96] | 1.3E-02 | 39%      |
| cg06235429 | 11  | 67129690  | <i>NDUFV1</i>   | 1.49    | [1.3-1.7]   | 5.5E-09 | 1.38             | [1.2-1.6]   | 1.2E-05 | 22%      | 1.32             | [1.11-1.57] | 1.9E-03 | 35%      | 1.25             | [1.04-1.5]  | 1.6E-02 | 48%      |
| cg05778424 | 17  | 52524507  | <i>AKAP1</i>    | 1.69    | [1.42-2.02] | 7.4E-09 | 1.57             | [1.3-1.91]  | 5.1E-06 | 17%      | 1.41             | [1.12-1.78] | 3.6E-03 | 41%      | 1.35             | [1.06-1.72] | 1.6E-02 | 50%      |
| cg11376147 | 11  | 57017774  | <i>SLC43A1</i>  | 0.68    | [0.59-0.77] | 1.3E-08 | 0.72             | [0.62-0.84] | 1.4E-05 | 14%      | 0.66             | [0.55-0.79] | 5.2E-06 | -4%      | 0.68             | [0.56-0.82] | 6.8E-05 | 2%       |
| cg04816311 | 7   | 1033176   | <i>C7orf50</i>  | 1.51    | [1.31-1.75] | 1.7E-08 | 1.47             | [1.26-1.72] | 1.4E-06 | 8%       | 1.18             | [0.98-1.43] | 7.4E-02 | 64%      | 1.19             | [0.98-1.44] | 8.2E-02 | 63%      |
| cg02711608 | 19  | 51979804  | <i>SLCIA5</i>   | 0.69    | [0.6-0.79]  | 4.5E-08 | 0.77             | [0.67-0.89] | 5.5E-04 | 27%      | 0.79             | [0.66-0.93] | 5.0E-03 | 31%      | 0.84             | [0.7-1.01]  | 6.3E-02 | 50%      |
| cg08309687 | 21  | 34242466  | -               | 0.68    | [0.6-0.78]  | 4.5E-08 | 0.75             | [0.64-0.87] | 1.4E-04 | 20%      | 0.79             | [0.67-0.95] | 1.0E-02 | 35%      | 0.86             | [0.71-1.03] | 1.1E-01 | 56%      |
| cg13514042 | 7   | 1158728   | -               | 1.42    | [1.25-1.61] | 4.5E-08 | 1.33             | [1.16-1.53] | 4.0E-05 | 20%      | 1.36             | [1.16-1.59] | 1.9E-04 | 15%      | 1.30             | [1.1-1.54]  | 2.3E-03 | 28%      |
| cg08994060 | 10  | 6254032   | <i>PFKFB3</i>   | 0.65    | [0.55-0.76] | 5.2E-08 | 0.67             | [0.56-0.79] | 4.5E-06 | 6%       | 0.73             | [0.59-0.89] | 2.1E-03 | 23%      | 0.74             | [0.59-0.91] | 5.1E-03 | 25%      |
| cg01676795 | 7   | 75424284  | <i>POR</i>      | 1.56    | [1.33-1.84] | 6.5E-08 | 1.48             | [1.24-1.77] | 1.3E-05 | 14%      | 1.34             | [1.08-1.67] | 7.6E-03 | 39%      | 1.28             | [1.02-1.61] | 3.3E-02 | 50%      |
| cg25130381 | 1   | 27313308  | <i>SLC9A1</i>   | 1.49    | [1.29-1.73] | 6.7E-08 | 1.42             | [1.22-1.67] | 1.0E-05 | 14%      | 1.23             | [1.02-1.48] | 3.2E-02 | 54%      | 1.21             | [1-1.48]    | 5.3E-02 | 57%      |
| cg11183227 | 15  | 89256411  | <i>MAN2A2</i>   | 1.49    | [1.29-1.72] | 7.0E-08 | 1.42             | [1.21-1.66] | 1.7E-05 | 14%      | 1.18             | [0.99-1.42] | 6.8E-02 | 62%      | 1.16             | [0.96-1.41] | 1.3E-01 | 67%      |

SUPPLEMENTARY DATA

**Supplementary Table S4. Significant gene-set enrichment analysis results for the EWAS result with MAGENTA.**

Significance is based on the FDR 75% cut-off. For further details see the original paper (Segrè *et al.* 2010).

| Database  | Gene Set                   | Nominal GSEA P-val 75% cut-off | FDR 75% cut-off | Exp. Genes above 75% cutoff | Obs. Genes above 75% cutoff |
|-----------|----------------------------|--------------------------------|-----------------|-----------------------------|-----------------------------|
| Ingenuity | JAK.Stat.Signaling         | 3.00E-04                       | 3.90E-03        | 3                           | 8                           |
| Ingenuity | Erythropoietin.Signaling   | 4.00E-04                       | 4.50E-03        | 4                           | 10                          |
| Ingenuity | Insulin.Receptor.Signaling | 1.17E-04                       | 5.60E-03        | 9                           | 19                          |
| Ingenuity | Fc.Epsilon.RI.Signaling    | 3.00E-04                       | 6.20E-03        | 4                           | 10                          |
| Ingenuity | PI3K.AKT.Signaling         | 1.20E-03                       | 1.03E-02        | 7                           | 15                          |
| Ingenuity | T.Cell.Receptor.Signaling  | 2.10E-03                       | 1.26E-02        | 8                           | 16                          |
| Ingenuity | Integrin.Signaling         | 1.00E-03                       | 1.29E-02        | 9                           | 18                          |
| Ingenuity | B.Cell.Receptor.Signaling  | 2.20E-03                       | 1.32E-02        | 8                           | 16                          |
| Ingenuity | Neuregulin.Signaling       | 2.10E-03                       | 1.56E-02        | 6                           | 13                          |
| Ingenuity | IGF-1.Signaling            | 6.10E-03                       | 2.10E-02        | 5                           | 10                          |

SUPPLEMENTARY DATA

**Supplementary Table S5. Evaluation of the top 18 T2DM-associated MVPs with glycemic traits in the Framingham Heart Studies and with BMI in Wahl *et al.*, 2017**

Direction of methylation: Associations are aligned to T2DM-increasing methylation changes. MVPs with associations P<0.05 are highlighted in bold.

\*Adjusted for age, sex, PC1-3 (calculated from methylation data), batch and family structure.

\*\* Additionally adjusted for BMI.

| CpG ID     | Chr Gene           | Direction of methylation | Fasting glucose (n=2117)* |                |                | Fasting insulin (n=2151)** |                |                | HbA1c (n=2156)* |                |                | BMI Wahl (n=10,261) |            |                |
|------------|--------------------|--------------------------|---------------------------|----------------|----------------|----------------------------|----------------|----------------|-----------------|----------------|----------------|---------------------|------------|----------------|
|            |                    |                          | beta                      | se             | p              | beta                       | se             | p              | beta            | se             | p              | beta                | se         | p              |
| cg19693031 | 1 <i>TXNIP</i>     | Decreasing               | <b>7.4E-04</b>            | <b>1.2E-04</b> | <b>4.0E-10</b> | <b>3.4E-03</b>             | <b>1.5E-03</b> | <b>2.1E-02</b> | <b>1.1E-02</b>  | <b>3.9E-03</b> | <b>6.0E-03</b> | <b>-9.8</b>         | <b>2.0</b> | <b>1.5E-06</b> |
| cg06500161 | 21 <i>ABCG1</i>    | Increasing               | <b>5.8E-04</b>            | <b>7.9E-05</b> | <b>4.6E-13</b> | <b>8.3E-03</b>             | <b>9.5E-04</b> | <b>3.9E-18</b> | <b>1.4E-02</b>  | <b>2.6E-03</b> | <b>2.0E-07</b> | <b>34.8</b>         | <b>2.3</b> | <b>1.7E-53</b> |
| cg14476101 | 1 <i>PHGDH</i>     | Decreasing               | <b>8.5E-04</b>            | <b>1.6E-04</b> | <b>9.5E-08</b> | <b>5.5E-03</b>             | <b>1.9E-03</b> | <b>4.4E-03</b> | -1.4E-03        | 5.3E-03        | 7.9E-01        | <b>-14.5</b>        | <b>1.6</b> | <b>4.1E-20</b> |
| cg14020176 | 17 <i>SLC9A3R1</i> | Increasing               | 6.9E-05                   | 6.7E-05        | 3.1E-01        | <b>2.2E-03</b>             | <b>8.4E-04</b> | <b>7.9E-03</b> | <b>7.0E-03</b>  | <b>2.2E-03</b> | <b>1.9E-03</b> | <b>17.5</b>         | <b>3.0</b> | <b>3.3E-09</b> |
| cg11024682 | 17 <i>SREBF1</i>   | Increasing               | <b>3.5E-04</b>            | <b>6.9E-05</b> | <b>6.9E-07</b> | <b>5.4E-03</b>             | <b>8.4E-04</b> | <b>1.5E-10</b> | <b>9.6E-03</b>  | <b>2.3E-03</b> | <b>3.0E-05</b> | <b>32.5</b>         | <b>3.0</b> | <b>3.6E-27</b> |
| cg06397161 | 22 <i>SYNGR1</i>   | Increasing               | 8.6E-05                   | 9.7E-05        | 3.8E-01        | <b>3.7E-03</b>             | <b>1.2E-03</b> | <b>2.2E-03</b> | 6.1E-03         | 3.2E-03        | 6.1E-02        | <b>13.6</b>         | <b>2.2</b> | <b>5.7E-10</b> |
| cg00574958 | 11 <i>CPT1A</i>    | Decreasing               | <b>2.6E-04</b>            | <b>3.6E-05</b> | <b>4.4E-13</b> | <b>3.2E-03</b>             | <b>4.3E-04</b> | <b>4.4E-13</b> | <b>3.6E-03</b>  | <b>1.2E-03</b> | <b>2.4E-03</b> | <b>-40.2</b>        | <b>3.1</b> | <b>1.4E-38</b> |
| cg06235429 | 11 <i>NDUFV1</i>   | Increasing               | 7.5E-05                   | 5.8E-05        | 1.9E-01        | 3.2E-04                    | 7.1E-04        | 6.5E-01        | 1.5E-03         | 1.9E-03        | 4.3E-01        | <b>15.5</b>         | <b>3.9</b> | <b>8.3E-05</b> |
| cg05778424 | 17 <i>AKAP1</i>    | Increasing               | <b>2.1E-04</b>            | <b>7.1E-05</b> | <b>3.5E-03</b> | <b>3.3E-03</b>             | <b>8.8E-04</b> | <b>2.1E-04</b> | <b>7.5E-03</b>  | <b>2.4E-03</b> | <b>1.6E-03</b> | <b>21.6</b>         | <b>2.8</b> | <b>1.2E-14</b> |
| cg11376147 | 11 <i>SLC43A1</i>  | Decreasing               | <b>1.5E-04</b>            | <b>5.5E-05</b> | <b>5.8E-03</b> | 1.1E-03                    | 6.8E-04        | 1.2E-01        | 2.5E-03         | 1.8E-03        | 1.7E-01        | <b>-25.3</b>        | <b>3.0</b> | <b>2.9E-17</b> |
| cg04816311 | 7 <i>C7orf50</i>   | Increasing               | <b>4.8E-04</b>            | <b>1.4E-04</b> | <b>6.7E-04</b> | <b>6.2E-03</b>             | <b>1.7E-03</b> | <b>3.6E-04</b> | <b>1.8E-02</b>  | <b>4.7E-03</b> | <b>1.7E-04</b> | <b>9.3</b>          | <b>1.8</b> | <b>1.9E-07</b> |
| cg02711608 | 19 <i>SLC1A5</i>   | Decreasing               | <b>1.7E-04</b>            | <b>7.3E-05</b> | <b>2.2E-02</b> | <b>2.8E-03</b>             | <b>9.1E-04</b> | <b>2.4E-03</b> | -8.2E-04        | 2.4E-03        | 7.3E-01        | <b>-17.2</b>        | <b>2.4</b> | <b>1.3E-12</b> |
| cg08309687 | 21 -               | Decreasing               | <b>6.6E-04</b>            | <b>1.3E-04</b> | <b>7.9E-07</b> | <b>6.9E-03</b>             | <b>1.7E-03</b> | <b>3.0E-05</b> | <b>1.7E-02</b>  | <b>4.4E-03</b> | <b>9.6E-05</b> | <b>-15.2</b>        | <b>1.9</b> | <b>9.4E-16</b> |
| cg13514042 | 7 -                | Increasing               | 1.2E-04                   | 6.3E-05        | 5.9E-02        | 8.8E-04                    | 7.7E-04        | 2.6E-01        | 2.8E-03         | 2.1E-03        | 1.8E-01        | <b>14.7</b>         | <b>4.4</b> | <b>9.1E-04</b> |
| cg08994060 | 10 <i>PFKFB3</i>   | Decreasing               | <b>3.4E-04</b>            | <b>1.1E-04</b> | <b>2.2E-03</b> | <b>4.2E-03</b>             | <b>1.4E-03</b> | <b>3.0E-03</b> | <b>9.7E-03</b>  | <b>3.8E-03</b> | <b>9.7E-03</b> | <b>-7.2</b>         | <b>1.7</b> | <b>1.8E-05</b> |
| cg01676795 | 7 <i>POR</i>       | Increasing               | 1.6E-04                   | 1.0E-04        | 1.2E-01        | <b>3.1E-03</b>             | <b>1.3E-03</b> | <b>1.5E-02</b> | <b>1.3E-02</b>  | <b>3.5E-03</b> | <b>1.3E-04</b> | <b>10.7</b>         | <b>2.4</b> | <b>7.9E-06</b> |
| cg25130381 | 1 <i>SLC9A1</i>    | Increasing               | <b>1.6E-04</b>            | <b>7.6E-05</b> | <b>3.2E-02</b> | <b>3.5E-03</b>             | <b>9.4E-04</b> | <b>2.0E-04</b> | <b>6.1E-03</b>  | <b>2.6E-03</b> | <b>1.7E-02</b> | <b>14.1</b>         | <b>2.5</b> | <b>3.1E-08</b> |
| cg11183227 | 15 <i>MAN2A2</i>   | Increasing               | <b>2.6E-04</b>            | <b>9.0E-05</b> | <b>4.4E-03</b> | <b>3.1E-03</b>             | <b>1.1E-03</b> | <b>4.9E-03</b> | 5.5E-03         | 3.0E-03        | 6.4E-02        | <b>18.9</b>         | <b>2.8</b> | <b>3.0E-11</b> |

SUPPLEMENTARY DATA

**Supplementary Table S6. Evaluation of the top 18 T2DM-associated MVPs with cross-sectional differences in DNA methylation intensity between monozygous twin pairs discordant for Type 1 diabetes (T1DM).**

\*Odds ratio for incident T2DM in the discovery EPIC Norfolk study

FDR: false-discovery rate, based on paired T-tests. Delta Beta: Controls minus T1DM

No T1DM data were available for cg06397161 (SYNGR1) or cg02711608 (SLC1A5)

| CpG ID     | Gene            | OR for T2DM* | Monocyte      |              |               |                | B cell        |              |               |                | T cell        |              |               |                |
|------------|-----------------|--------------|---------------|--------------|---------------|----------------|---------------|--------------|---------------|----------------|---------------|--------------|---------------|----------------|
|            |                 |              | Beta Controls | Beta T1DM    | Delta Beta    | FDR            | Beta Controls | Beta T1DM    | Delta Beta    | FDR            | Beta Controls | Beta T1DM    | Delta Beta    | FDR            |
| cg19693031 | <i>TXNP</i>     | <b>0.52</b>  | <b>0.680</b>  | <b>0.744</b> | <b>-0.064</b> | <b>2.1E-05</b> | <b>0.886</b>  | <b>0.919</b> | <b>-0.033</b> | <b>4.3E-04</b> | 0.806         | 0.803        | 0.003         | 7.9E-01        |
| cg06500161 | <i>ABCG1</i>    | 1.65         | 0.741         | 0.740        | 0.001         | 8.7E-01        | 0.491         | 0.481        | 0.010         | 3.2E-01        | 0.705         | 0.713        | -0.009        | 3.5E-01        |
| cg14476101 | <i>PHGDH</i>    | 0.67         | 0.658         | 0.649        | 0.009         | 5.3E-01        | 0.806         | 0.804        | 0.002         | 8.7E-01        | 0.883         | 0.883        | 0.001         | 9.0E-01        |
| cg14020176 | <i>SLC9A3R1</i> | <b>1.63</b>  | <b>0.639</b>  | <b>0.624</b> | <b>0.015</b>  | <b>4.3E-04</b> | 0.862         | 0.854        | 0.009         | 8.6E-01        | 0.905         | 0.903        | 0.002         | 7.9E-01        |
| cg11024682 | <i>SREBF1</i>   | <b>1.56</b>  | <b>0.414</b>  | <b>0.405</b> | <b>0.010</b>  | <b>2.9E-02</b> | 0.504         | 0.500        | 0.004         | 8.6E-01        | 0.525         | 0.516        | 0.009         | 3.5E-01        |
| cg00574958 | <i>CPT1A</i>    | <b>0.69</b>  | 0.032         | 0.033        | -0.001        | 8.5E-01        | 0.034         | 0.032        | 0.001         | 8.6E-01        | <b>0.136</b>  | <b>0.157</b> | <b>-0.021</b> | <b>8.3E-03</b> |
| cg06235429 | <i>NDUFV1</i>   | 1.49         | 0.891         | 0.889        | 0.002         | 8.2E-01        | 0.936         | 0.934        | 0.002         | 8.6E-01        | 0.942         | 0.946        | -0.004        | 3.5E-01        |
| cg05778424 | <i>AKAP1</i>    | 1.69         | 0.087         | 0.084        | 0.004         | 8.2E-01        | 0.764         | 0.769        | -0.005        | 8.6E-01        | 0.929         | 0.926        | 0.003         | 7.9E-01        |
| cg11376147 | <i>SLC43A1</i>  | 0.68         | 0.304         | 0.301        | 0.003         | 8.2E-01        | 0.246         | 0.245        | 0.001         | 9.3E-01        | 0.164         | 0.165        | 0.000         | 9.0E-01        |
| cg04816311 | <i>C7orf50</i>  | <b>1.51</b>  | <b>0.360</b>  | <b>0.333</b> | <b>0.026</b>  | <b>2.6E-02</b> | 0.328         | 0.333        | -0.005        | 8.6E-01        | 0.940         | 0.941        | -0.001        | 7.9E-01        |
| cg08309687 | NA              | <b>0.68</b>  | <b>0.657</b>  | <b>0.689</b> | <b>-0.032</b> | <b>4.0E-03</b> | 0.634         | 0.657        | -0.022        | 1.1E-01        | 0.069         | 0.067        | 0.002         | 7.9E-01        |
| cg13514042 | NA              | 1.42         | 0.814         | 0.813        | 0.001         | 8.7E-01        | 0.854         | 0.850        | 0.004         | 8.6E-01        | 0.912         | 0.910        | 0.002         | 7.9E-01        |
| cg08994060 | <i>PFKFB3</i>   | <b>0.65</b>  | <b>0.090</b>  | <b>0.105</b> | <b>-0.015</b> | <b>2.0E-02</b> | <b>0.334</b>  | <b>0.377</b> | <b>-0.043</b> | <b>1.2E-05</b> | <b>0.576</b>  | <b>0.594</b> | <b>-0.018</b> | <b>4.7E-02</b> |
| cg01676795 | <i>POR</i>      | 1.56         | 0.901         | 0.900        | 0.001         | 8.7E-01        | 0.960         | 0.963        | -0.002        | 8.6E-01        | 0.982         | 0.980        | 0.002         | 3.5E-01        |
| cg25130381 | <i>SLC9A1</i>   | 1.49         | 0.676         | 0.665        | 0.011         | 3.0E-01        | 0.819         | 0.817        | 0.002         | 8.7E-01        | 0.436         | 0.428        | 0.008         | 5.1E-01        |
| cg11183227 | <i>MAN2A2</i>   | 1.49         | 0.981         | 0.981        | -0.001        | 8.2E-01        | 0.976         | 0.975        | 0.001         | 8.6E-01        | 0.983         | 0.982        | 0.002         | 3.5E-01        |

SUPPLEMENTARY DATA

**Supplementary Table S7. Spearman correlations in DNA methylation intensity between whole blood and liver, pancreas, adipose tissue or muscle at the top 18 T2DM-associated MVPs.**

Liver and Pancreas samples are from 6 cadaveric samples; Spearman Rho values  $\geq 0.5$  are highlighted in bold  
 Fat and muscle samples are from 14 and 16 twin pairs, respectively; correlations at  $P < 0.05$  are highlighted in bold

| BLOOD (T2DM EPIC-Norfolk) |     |                 | LIVER      |             | PANCREAS   |         | FAT        |               | MUSCLE     |             |
|---------------------------|-----|-----------------|------------|-------------|------------|---------|------------|---------------|------------|-------------|
| CpG ID                    | Chr | Gene            | Rho        | P-value     | Rho        | P-value | Rho        | P-value       | Rho        | P-value     |
| cg19693031                | 1   | <i>TXNIP</i>    | <b>0.7</b> | 0.23        | <b>0.8</b> | 0.33    | -0.2       | 0.24          | 0.2        | 0.25        |
| cg06500161                | 21  | <i>ABCG1</i>    | -0.7       | 0.23        | 0.2        | 0.92    | 0.1        | 0.68          | 0.0        | 0.87        |
| cg14476101                | 1   | <i>PHGDH</i>    | <b>0.7</b> | 0.23        | 0.2        | 0.92    | 0.2        | 0.23          | -0.1       | 0.78        |
| cg14020176                | 17  | <i>SLC9A3RI</i> | <b>0.7</b> | 0.23        | <b>0.8</b> | 0.33    | <b>0.4</b> | <b>0.05</b>   | 0.0        | 0.81        |
| cg11024682                | 17  | <i>SREBF1</i>   | 0.4        | 0.52        | 0.0        | 1.00    | <b>0.5</b> | <b>0.01</b>   | 0.0        | 0.79        |
| cg06397161                | 22  | <i>SYNGRI</i>   | 0.3        | 0.68        | 0.0        | 1.00    | <b>0.5</b> | <b>0.01</b>   | 0.2        | 0.18        |
| cg00574958                | 11  | <i>CPTIA</i>    | <b>0.5</b> | 0.45        | -0.4       | 0.75    | <b>0.5</b> | <b>0.01</b>   | -0.2       | 0.21        |
| cg06235429                | 11  | <i>NDUFV1</i>   | -0.8       | 0.13        | 0.4        | 0.75    | 0.3        | 0.08          | 0.0        | 0.85        |
| cg05778424                | 17  | <i>AKAP1</i>    | -0.5       | 0.45        | -0.8       | 0.33    | 0.2        | 0.20          | 0.0        | 0.95        |
| cg11376147                | 11  | <i>SLC43A1</i>  | <b>0.7</b> | 0.23        | 0.4        | 0.75    | 0.2        | 0.40          | -0.2       | 0.20        |
| cg04816311                | 7   | <i>C7orf50</i>  | <b>0.6</b> | 0.35        | 0.2        | 0.92    | -0.1       | 0.64          | 0.1        | 0.63        |
| cg02711608                | 19  | <i>SLCIA5</i>   | <b>1.0</b> | <b>0.02</b> | 0.0        | 1.00    | 0.2        | 0.37          | -0.1       | 0.47        |
| cg08309687                | 21  | <i>NA</i>       | 0.1        | 0.95        | 0.2        | 0.92    | <b>0.7</b> | <b>0.0001</b> | 0.0        | 0.95        |
| cg13514042                | 7   | <i>NA</i>       | -0.5       | 0.45        | 0.2        | 0.92    | -0.1       | 0.76          | 0.0        | 0.95        |
| cg08994060                | 10  | <i>PFKFB3</i>   | 0.0        | 1.00        | -0.4       | 0.75    | 0.2        | 0.24          | <b>0.4</b> | <b>0.03</b> |
| cg01676795                | 7   | <i>POR</i>      | -0.9       | 0.08        | 1.0        | 0.08    | 0.2        | 0.43          | -0.2       | 0.37        |
| cg25130381                | 1   | <i>SLC9A1</i>   | -0.3       | 0.68        | 0.0        | 1.00    | 0.2        | 0.32          | -0.1       | 0.58        |
| cg11183227                | 15  | <i>MAN2A2</i>   | <b>0.7</b> | 0.23        | <b>0.6</b> | 0.42    | <b>0.4</b> | <b>0.02</b>   | 0.1        | 0.63        |

SUPPLEMENTARY DATA

**Supplementary Table S8. Individual methQTLs identified in the BIOS-QTL browser for 16 of the 18 T2DM-associated MVPs.**

Methylation quantitative trait loci (methQTLs) are SNPs with a genome-wide significant association (FDR < 5%) with any of the 18 T2DM-associated MVPs.

\* aligned to increasing T2DM.

| MVP and its observed association with T2DM |     |           |                 |                         |             | SNP to Methylation |     |           |       |    |    |                              |           |
|--------------------------------------------|-----|-----------|-----------------|-------------------------|-------------|--------------------|-----|-----------|-------|----|----|------------------------------|-----------|
| MVP                                        | chr | position  | Gene            | OR* <sub>MVP-T2DM</sub> | CI 95%      | SNP                | chr | position  | Type  | A1 | A2 | Z-score <sub>A1-to-MVP</sub> | P-value   |
| cg05778424                                 | 17  | 52524507  | <i>AKAP1</i>    | 1.69                    | [1.42-2.02] | rs1047891          | 2   | 211540507 | trans | A  | C  | -8.23                        | 1.93E-16  |
| cg05778424                                 | 17  | 52524507  | <i>AKAP1</i>    | 1.69                    | [1.42-2.02] | rs715              | 2   | 211543055 | trans | C  | T  | -8                           | 1.20E-15  |
| cg14020176                                 | 17  | 70276580  | <i>SLC9A3R1</i> | 1.63                    | [1.4-1.9]   | rs7529925          | 1   | 199007208 | trans | C  | T  | 6.64                         | 3.12E-11  |
| cg11183227                                 | 15  | 89256411  | <i>MAN2A2</i>   | 1.49                    | [1.29-1.72] | rs9790517          | 4   | 106084778 | trans | T  | C  | -6.48                        | 9.44E-11  |
| cg05778424                                 | 17  | 52524507  | <i>AKAP1</i>    | 1.69                    | [1.42-2.02] | rs2216405          | 2   | 211616894 | trans | G  | A  | -6.44                        | 1.20E-10  |
| cg05778424                                 | 17  | 52524507  | <i>AKAP1</i>    | 1.69                    | [1.42-2.02] | rs1544196          | 1   | 224632782 | trans | A  | G  | -6.43                        | 1.26E-10  |
| cg08309687                                 | 21  | 34242466  |                 | 1.46                    | [1.28-1.68] | rs6763931          | 3   | 141102833 | trans | A  | G  | 5.7                          | 1.23E-08  |
| cg08309687                                 | 21  | 34242466  |                 | 1.46                    | [1.28-1.68] | rs1991431          | 3   | 141133450 | trans | A  | G  | 5.69                         | 1.25E-08  |
| cg08309687                                 | 21  | 34242466  |                 | 1.46                    | [1.28-1.68] | rs724016           | 3   | 141105570 | trans | G  | A  | 5.69                         | 1.25E-08  |
| cg08309687                                 | 21  | 34242466  |                 | 1.46                    | [1.28-1.68] | rs6440003          | 3   | 141094209 | trans | A  | G  | 5.63                         | 1.84E-08  |
| cg00574958                                 | 11  | 68364198  | <i>CPT1A</i>    | 1.45                    | [1.28-1.64] | rs964184           | 11  | 116648917 | trans | G  | C  | -5.54                        | 2.99E-08  |
| cg08994060                                 | 10  | 6254032   | <i>PFKFB3</i>   | 1.55                    | [1.32-1.81] | rs6763931          | 3   | 141102833 | trans | A  | G  | 5.48                         | 4.30E-08  |
| cg00574958                                 | 11  | 68364198  | <i>CPT1A</i>    | 1.45                    | [1.28-1.64] | rs3741298          | 11  | 116657561 | trans | C  | T  | -5.48                        | 4.34E-08  |
| cg08309687                                 | 21  | 34242466  |                 | 1.46                    | [1.28-1.68] | rs9310736          | 3   | 24350811  | trans | A  | G  | -5.48                        | 4.36E-08  |
| cg08994060                                 | 10  | 6254032   | <i>PFKFB3</i>   | 1.55                    | [1.32-1.81] | rs6440003          | 3   | 141094209 | trans | A  | G  | 5.46                         | 4.70E-08  |
| cg08994060                                 | 10  | 6254032   | <i>PFKFB3</i>   | 1.55                    | [1.32-1.81] | rs724016           | 3   | 141105570 | trans | G  | A  | 5.43                         | 5.72E-08  |
| cg02711608                                 | 19  | 51979804  | <i>SLC1A5</i>   | 1.45                    | [1.27-1.66] | rs4948102          | 7   | 56097265  | trans | C  | G  | -5.41                        | 6.25E-08  |
| cg08994060                                 | 10  | 6254032   | <i>PFKFB3</i>   | 1.55                    | [1.32-1.81] | rs1991431          | 3   | 141133450 | trans | A  | G  | 5.29                         | 1.23E-07  |
| cg11024682                                 | 17  | 17670819  | <i>SREBF1</i>   | 1.56                    | [1.35-1.79] | rs7701414          | 5   | 131585958 | trans | G  | A  | 5.21                         | 1.94E-07  |
| cg11024682                                 | 17  | 17670819  | <i>SREBF1</i>   | 1.56                    | [1.35-1.79] | rs7529925          | 1   | 199007208 | trans | C  | T  | -5.15                        | 2.62E-07  |
| cg11183227                                 | 15  | 89256411  | <i>MAN2A2</i>   | 1.49                    | [1.29-1.72] | rs1544196          | 1   | 224632782 | trans | A  | G  | -5.15                        | 2.65E-07  |
| cg08994060                                 | 10  | 6254032   | <i>PFKFB3</i>   | 1.55                    | [1.32-1.81] | rs592866           | 10  | 6205922   | cis   | A  | T  | -41.2                        | 3.27E-310 |
| cg04816311                                 | 7   | 1033176   | <i>C7orf50</i>  | 1.51                    | [1.31-1.75] | rs56048221         | 7   | 1092533   | cis   | G  | A  | 32.6                         | 4.80E-233 |
| cg14476101                                 | 1   | 120057515 | <i>PHGDH</i>    | 1.50                    | [1.32-1.7]  | rs11583993         | 1   | 120255370 | cis   | A  | G  | -32.2                        | 3.85E-228 |
| cg01676795                                 | 7   | 75424284  | <i>POR</i>      | 1.56                    | [1.33-1.84] | rs10954750         | 7   | 75664921  | cis   | C  | G  | -22.8                        | 7.21E-115 |
| cg06397161                                 | 22  | 38090005  | <i>SYNGR1</i>   | 1.51                    | [1.32-1.73] | rs2069235          | 22  | 39747780  | cis   | A  | G  | -17.5                        | 1.72E-68  |



SUPPLEMENTARY DATA

|            |    |           |                 |      |             |             |    |           |     |   |   |       |          |
|------------|----|-----------|-----------------|------|-------------|-------------|----|-----------|-----|---|---|-------|----------|
| cg08309687 | 21 | 34242466  |                 | 1.46 | [1.28-1.68] | rs8128167   | 21 | 35307200  | cis | C | T | 17.5  | 1.92E-68 |
| cg13514042 | 7  | 1158728   |                 | 1.42 | [1.25-1.61] | rs2949204   | 7  | 1200845   | cis | G | A | 16.1  | 4.85E-58 |
| cg06235429 | 11 | 67129690  | <i>NDUFV1</i>   | 1.49 | [1.3-1.7]   | rs4244823   | 11 | 67361356  | cis | A | G | -13.9 | 1.24E-43 |
| cg14020176 | 17 | 70276580  | <i>SLC9A3R1</i> | 1.63 | [1.4-1.9]   | rs12601504  | 17 | 72754829  | cis | C | T | 13.5  | 2.02E-41 |
| cg06397161 | 22 | 38090005  | <i>SYNGR1</i>   | 1.51 | [1.32-1.73] | rs1569499   | 22 | 39769818  | cis | T | C | -13.4 | 3.50E-41 |
| cg04816311 | 7  | 1033176   | <i>C7orf50</i>  | 1.51 | [1.31-1.75] | rs12701708  | 7  | 1090333   | cis | T | C | -12.4 | 4.25E-35 |
| cg05778424 | 17 | 52524507  | <i>AKAP1</i>    | 1.69 | [1.42-2.02] | rs2160115   | 17 | 55165612  | cis | C | T | -12.1 | 7.15E-34 |
| cg08309687 | 21 | 34242466  |                 | 1.46 | [1.28-1.68] | rs2051387   | 21 | 35364046  | cis | A | T | -10.9 | 1.22E-27 |
| cg13514042 | 7  | 1158728   |                 | 1.42 | [1.25-1.61] | rs13226093  | 7  | 1168754   | cis | C | T | -10.1 | 8.45E-24 |
| cg11024682 | 17 | 17670819  | <i>SREBF1</i>   | 1.56 | [1.35-1.79] | rs8070432   | 17 | 17480474  | cis | C | T | 8.92  | 4.83E-19 |
| cg05778424 | 17 | 52524507  | <i>AKAP1</i>    | 1.69 | [1.42-2.02] | rs148596028 | 17 | 55210022  | cis | T | C | -8.45 | 2.87E-17 |
| cg14476101 | 1  | 120057515 | <i>PHGDH</i>    | 1.50 | [1.32-1.7]  | rs41276626  | 1  | 120262112 | cis | A | G | 7.59  | 3.14E-14 |
| cg01676795 | 7  | 75424284  | <i>POR</i>      | 1.56 | [1.33-1.84] | rs239950    | 7  | 75581714  | cis | G | A | -6.85 | 7.24E-12 |
| cg08309687 | 21 | 34242466  |                 | 1.46 | [1.28-1.68] | rs75586969  | 21 | 35265459  | cis | T | C | -6.64 | 3.03E-11 |
| cg04816311 | 7  | 1033176   | <i>C7orf50</i>  | 1.51 | [1.31-1.75] | rs7784559   | 7  | 1002973   | cis | A | G | -6    | 1.99E-09 |
| cg05778424 | 17 | 52524507  | <i>AKAP1</i>    | 1.69 | [1.42-2.02] | rs3094438   | 17 | 55188373  | cis | C | G | 5.92  | 3.13E-09 |
| cg14476101 | 1  | 120057515 | <i>PHGDH</i>    | 1.50 | [1.32-1.7]  | rs34291690  | 1  | 120099137 | cis | A | G | 5.34  | 9.22E-08 |
| cg04816311 | 7  | 1033176   | <i>C7orf50</i>  | 1.51 | [1.31-1.75] | rs13226093  | 7  | 1168754   | cis | C | T | -5.24 | 1.64E-07 |
| cg11376147 | 11 | 57017774  | <i>SLC43A1</i>  | 1.48 | [1.29-1.69] | rs2511984   | 11 | 57278733  | cis | T | C | -5.22 | 1.76E-07 |
| cg01676795 | 7  | 75424284  | <i>POR</i>      | 1.56 | [1.33-1.84] | rs10954672  | 7  | 75481823  | cis | A | G | -5.07 | 3.94E-07 |
| cg01676795 | 7  | 75424284  | <i>POR</i>      | 1.56 | [1.33-1.84] | rs59882870  | 7  | 75638421  | cis | A | G | -4.74 | 2.11E-06 |
| cg01676795 | 7  | 75424284  | <i>POR</i>      | 1.56 | [1.33-1.84] | rs7777399   | 7  | 75618797  | cis | T | C | -4.28 | 1.88E-05 |
| cg05778424 | 17 | 52524507  | <i>AKAP1</i>    | 1.69 | [1.42-2.02] | rs72843415  | 17 | 55163250  | cis | T | C | -4.14 | 3.51E-05 |
| cg06235429 | 11 | 67129690  | <i>NDUFV1</i>   | 1.49 | [1.3-1.7]   | rs12799746  | 11 | 67246630  | cis | T | C | -4.1  | 4.06E-05 |
| cg08994060 | 10 | 6254032   | <i>PFKFB3</i>   | 1.55 | [1.32-1.81] | rs584797    | 10 | 6220496   | cis | A | G | 4.06  | 4.98E-05 |
| cg13514042 | 7  | 1158728   |                 | 1.42 | [1.25-1.61] | rs55633977  | 7  | 1122645   | cis | T | C | -4.05 | 5.14E-05 |
| cg01676795 | 7  | 75424284  | <i>POR</i>      | 1.56 | [1.33-1.84] | rs73145061  | 7  | 75353969  | cis | C | G | -4.02 | 5.81E-05 |
| cg25130381 | 1  | 27313308  | <i>SLC9A1</i>   | 1.49 | [1.29-1.73] | rs34079867  | 1  | 27407850  | cis | T | C | -3.88 | 0.000105 |

SUPPLEMENTARY DATA

**Supplementary Table S9. Genetically predicted effects of methylation intensity at 16 MVPs on T2DM.**

No of methQTLs: number of methQTLs used in Mendelian Randomization analysis after clumping the SNPs using the R package *TwoSampleMR*. The remaining columns are generated using the *TwoSampleMR* package in R. Beta's indicate the log-odds ratios per 1 unit increase normalised methylation intensity.

| MVP        | Gene            | No. of methQTLs | MR model                  | Predicted effect |       |      | Heterogeneity |    |       | Directional pleiotropy |      |      |
|------------|-----------------|-----------------|---------------------------|------------------|-------|------|---------------|----|-------|------------------------|------|------|
|            |                 |                 |                           | b                | se    | P    | Q             | df | P-val | Egger_intercept        | se   | P    |
| cg08994060 | <i>PFKFB3</i>   | 2               | Inverse variance weighted | -0.003           | 0.029 | 0.92 | 0             | 1  | 1     |                        |      |      |
| cg11183227 | <i>MAN2A2</i>   | 2               | Inverse variance weighted | 0.026            | 0.038 | 0.50 | 0             | 1  | 1     |                        |      |      |
| cg02711608 | <i>SLC1A5</i>   | 1               | Wald ratio                | 0.018            | 0.064 | 0.78 |               |    |       |                        |      |      |
| cg08309687 | -               | 3               | MR Egger                  | 0.001            | 0.085 | 0.99 | 6.62          | 1  | 0.01  | -0.01                  | 0.02 | 0.68 |
| cg08309687 | -               | 3               | Inverse variance weighted | -0.039           | 0.034 | 0.25 | 4.32          | 2  | 0.12  |                        |      |      |
| cg14020176 | <i>SLC9A3R1</i> | 2               | Inverse variance weighted | -0.027           | 0.022 | 0.22 | 0             | 1  | 1     |                        |      |      |
| cg06397161 | <i>SYNGR1</i>   | 1               | Wald ratio                | 0.017            | 0.020 | 0.40 |               |    |       |                        |      |      |
| cg00574958 | <i>CPT1A</i>    | 1               | Wald ratio                | -0.142           | 0.056 | 0.01 |               |    |       |                        |      |      |
| cg11376147 | <i>SLC43A1</i>  | 1               | Wald ratio                | -0.028           | 0.067 | 0.68 |               |    |       |                        |      |      |
| cg25130381 | <i>SLC9A1</i>   | 1               | Wald ratio                | -0.150           | 0.091 | 0.10 |               |    |       |                        |      |      |
| cg11024682 | <i>SREBF1</i>   | 3               | MR Egger                  | 0.058            | 0.054 | 0.48 | 0.20          | 1  | 0.65  | -0.01                  | 0.01 | 0.45 |
| cg11024682 | <i>SREBF1</i>   | 3               | Inverse variance weighted | 0.004            | 0.028 | 0.88 | 0.77          | 2  | 0.68  |                        |      |      |
| cg05778424 | <i>AKAP1</i>    | 3               | MR Egger                  | 0.022            | 0.108 | 0.87 | 0.04          | 1  | 0.85  | -0.01                  | 0.03 | 0.86 |
| cg05778424 | <i>AKAP1</i>    | 3               | Inverse variance weighted | -0.002           | 0.019 | 0.94 | 0.04          | 2  | 0.98  |                        |      |      |
| cg14476101 | <i>PHGDH</i>    | 2               | Inverse variance weighted | -0.005           | 0.010 | 0.65 | 0             | 1  | 1     |                        |      |      |
| cg04816311 | <i>C7orf50</i>  | 2               | Inverse variance weighted | -0.010           | 0.011 | 0.39 | 0             | 1  | 1     |                        |      |      |
| cg01676795 | <i>POR</i>      | 4               | MR Egger                  | -0.013           | 0.041 | 0.79 | 6.18          | 2  | 0.05  | 0.00                   | 0.01 | 0.89 |
| cg01676795 | <i>POR</i>      | 4               | Inverse variance weighted | -0.007           | 0.021 | 0.73 | 4.17          | 3  | 0.24  |                        |      |      |
| cg06235429 | <i>NDUFV1</i>   | 1               | Wald ratio                | 0.017            | 0.025 | 0.50 |               |    |       |                        |      |      |
| cg13514042 | -               | 1               | Wald ratio                | -0.011           | 0.021 | 0.59 |               |    |       |                        |      |      |

SUPPLEMENTARY DATA

**Supplementary Table S10. Mendelian Randomisation tests for determinants of the 18 T2DM-associated MVPs.**

Results for the MR associations for the inverse-variance weighted and MR-Egger methods using 2 hour glucose (Saxena *et al.*, 2010), BMI (Locke *et al.*, 2015), fasting glucose (Manning *et al.*, 2012), fasting insulin (Scott *et al.*, 2012), fasting insulin adjusted for BMI (Manning *et al.*, 2012), insulin secretion (Prokopenko *et al.*, 2014), insulin resistance (Lotta *et al.*, 2016), T2DM status (Morris *et al.*, 2012) and waist hip ratio (Shungin *et al.*, 2015) associated SNPs instrument variables.

| Potential Determinant | MVP        | IVW MR |      |         | Heterogeneity |                | Egger MR |      |         |           |              |                   |
|-----------------------|------------|--------|------|---------|---------------|----------------|----------|------|---------|-----------|--------------|-------------------|
|                       |            | Beta   | SE   | p-value | Coch Q        | Coch Q p-value | Beta     | SE   | p-value | intercept | SE intercept | p-value intercept |
| 2 hour glucose        | cg00574958 | 0.06   | 0.28 | 0.82    | 72.31         | 2.37E-05       | -0.33    | 0.51 | 0.52    | 0.01      | 0.01         | 0.35              |
| 2 hour glucose        | cg01676795 | 0.15   | 0.27 | 0.58    | 58.10         | 1.56E-03       | -0.42    | 0.49 | 0.39    | 0.02      | 0.01         | 0.09              |
| 2 hour glucose        | cg02711608 | 0.22   | 0.20 | 0.26    | 5.44          | 0.71           | 0.37     | 0.81 | 0.65    | -0.01     | 0.06         | 0.85              |
| 2 hour glucose        | cg04816311 | -0.06  | 0.20 | 0.76    | 5.65          | 0.69           | 0.69     | 0.77 | 0.37    | -0.06     | 0.06         | 0.31              |
| 2 hour glucose        | cg05778424 | 0.26   | 0.18 | 0.15    | 4.55          | 0.80           | -0.15    | 0.70 | 0.83    | 0.03      | 0.06         | 0.55              |
| 2 hour glucose        | cg06235429 | -0.10  | 0.18 | 0.57    | 3.08          | 0.93           | -0.56    | 0.67 | 0.40    | 0.04      | 0.05         | 0.44              |
| 2 hour glucose        | cg06397161 | 0.31   | 0.20 | 0.12    | 5.25          | 0.73           | 0.95     | 0.77 | 0.22    | -0.05     | 0.06         | 0.39              |
| 2 hour glucose        | cg06500161 | 0.02   | 0.20 | 0.90    | 5.39          | 0.72           | 0.68     | 0.78 | 0.39    | -0.05     | 0.06         | 0.39              |
| 2 hour glucose        | cg08309687 | -0.35  | 0.19 | 0.06    | 4.45          | 0.81           | -0.18    | 0.76 | 0.81    | -0.01     | 0.06         | 0.82              |
| 2 hour glucose        | cg08994060 | 0.14   | 0.18 | 0.42    | 3.48          | 0.90           | 0.69     | 0.67 | 0.30    | -0.05     | 0.05         | 0.36              |
| 2 hour glucose        | cg11024682 | -0.17  | 0.18 | 0.34    | 2.88          | 0.94           | -0.76    | 0.67 | 0.26    | 0.05      | 0.04         | 0.25              |
| 2 hour glucose        | cg11183227 | -0.04  | 0.18 | 0.80    | 3.02          | 0.93           | 0.48     | 0.67 | 0.48    | -0.04     | 0.04         | 0.31              |
| 2 hour glucose        | cg11376147 | -0.20  | 0.28 | 0.48    | 10.85         | 0.21           | -0.73    | 1.14 | 0.52    | 0.04      | 0.09         | 0.63              |
| 2 hour glucose        | cg13514042 | 0.43   | 0.18 | 0.01    | 1.98          | 0.98           | -0.03    | 0.67 | 0.96    | 0.04      | 0.04         | 0.30              |
| 2 hour glucose        | cg14020176 | 0.36   | 0.23 | 0.12    | 8.81          | 0.36           | 0.38     | 0.96 | 0.69    | 0.00      | 0.08         | 0.98              |
| 2 hour glucose        | cg14476101 | -0.05  | 0.17 | 0.78    | 3.44          | 0.90           | -0.51    | 0.67 | 0.44    | 0.04      | 0.05         | 0.46              |
| 2 hour glucose        | cg19693031 | -0.31  | 0.20 | 0.12    | 6.26          | 0.62           | -1.37    | 0.71 | 0.05    | 0.09      | 0.06         | 0.12              |
| 2 hour glucose        | cg25130381 | 0.17   | 0.18 | 0.33    | 2.45          | 0.96           | 0.69     | 0.68 | 0.31    | -0.04     | 0.04         | 0.27              |
| BMI                   | cg00574958 | -0.14  | 0.17 | 0.44    | 176.24        | 5.1E-08        | -0.80    | 0.42 | 0.06    | 0.02      | 0.01         | 0.08              |
| BMI                   | cg01676795 | -0.18  | 0.17 | 0.29    | 161.10        | 2.4E-06        | -0.04    | 0.40 | 0.91    | 0.00      | 0.01         | 0.71              |
| BMI                   | cg02711608 | -0.12  | 0.17 | 0.46    | 161.70        | 2.1E-06        | -0.25    | 0.41 | 0.53    | 0.00      | 0.01         | 0.73              |
| BMI                   | cg04816311 | -0.19  | 0.17 | 0.27    | 173.55        | 1.0E-07        | -0.43    | 0.42 | 0.31    | 0.01      | 0.01         | 0.54              |
| BMI                   | cg05778424 | -0.19  | 0.18 | 0.29    | 184.66        | 5.3E-09        | -0.29    | 0.43 | 0.50    | 0.00      | 0.01         | 0.79              |
| BMI                   | cg06235429 | -0.02  | 0.17 | 0.90    | 157.40        | 5.8E-06        | -0.53    | 0.41 | 0.19    | 0.01      | 0.01         | 0.15              |
| BMI                   | cg06397161 | 0.06   | 0.17 | 0.71    | 155.59        | 8.8E-06        | -0.14    | 0.41 | 0.72    | 0.01      | 0.01         | 0.57              |

SUPPLEMENTARY DATA

|                           |            |       |      |      |        |         |       |      |      |       |      |         |
|---------------------------|------------|-------|------|------|--------|---------|-------|------|------|-------|------|---------|
| BMI                       | cg06500161 | -0.15 | 0.18 | 0.42 | 200.01 | 6.9E-11 | -0.05 | 0.44 | 0.91 | 0.00  | 0.01 | 0.81    |
| BMI                       | cg08309687 | 0.03  | 0.17 | 0.87 | 180.81 | 1.5E-08 | -0.37 | 0.42 | 0.38 | 0.01  | 0.01 | 0.30    |
| BMI                       | cg08994060 | 0.12  | 0.19 | 0.52 | 200.93 | 5.3E-11 | 0.69  | 0.45 | 0.12 | -0.02 | 0.01 | 0.16    |
| BMI                       | cg11024682 | -0.05 | 0.17 | 0.76 | 147.76 | 5.2E-05 | 0.06  | 0.41 | 0.88 | 0.00  | 0.01 | 0.75    |
| BMI                       | cg11183227 | -0.12 | 0.17 | 0.48 | 152.55 | 1.8E-05 | -0.02 | 0.41 | 0.96 | 0.00  | 0.01 | 0.78    |
| BMI                       | cg11376147 | -0.03 | 0.17 | 0.86 | 175.42 | 6.4E-08 | -0.39 | 0.42 | 0.34 | 0.01  | 0.01 | 0.34    |
| BMI                       | cg13514042 | -0.38 | 0.17 | 0.02 | 156.25 | 7.6E-06 | -0.93 | 0.41 | 0.02 | 0.02  | 0.01 | 0.12    |
| BMI                       | cg14020176 | -0.30 | 0.18 | 0.08 | 178.84 | 2.6E-08 | -0.83 | 0.42 | 0.05 | 0.02  | 0.01 | 0.17    |
| BMI                       | cg14476101 | -0.10 | 0.17 | 0.54 | 145.63 | 8.4E-05 | -0.33 | 0.40 | 0.41 | 0.01  | 0.01 | 0.52    |
| BMI                       | cg19693031 | 0.29  | 0.17 | 0.08 | 137.76 | 4.3E-04 | 0.19  | 0.40 | 0.64 | 0.00  | 0.01 | 0.77    |
| BMI                       | cg25130381 | 0.13  | 0.17 | 0.44 | 165.30 | 8.5E-07 | 0.62  | 0.41 | 0.13 | -0.01 | 0.01 | 0.19    |
| Fasting glucose           | cg00574958 | 0.06  | 0.28 | 0.82 | 72.31  | 2.4E-05 | -0.33 | 0.51 | 0.52 | 0.01  | 0.01 | 0.35    |
| Fasting glucose           | cg01676795 | 0.15  | 0.27 | 0.58 | 58.10  | 1.6E-03 | -0.42 | 0.49 | 0.39 | 0.02  | 0.01 | 0.09    |
| Fasting glucose           | cg02711608 | 0.13  | 0.27 | 0.64 | 59.01  | 1.2E-03 | 0.15  | 0.49 | 0.76 | 0.00  | 0.01 | 0.96    |
| Fasting glucose           | cg04816311 | 0.31  | 0.27 | 0.26 | 59.63  | 1.0E-03 | 0.31  | 0.50 | 0.54 | 0.00  | 0.01 | 0.99    |
| Fasting glucose           | cg05778424 | 0.19  | 0.34 | 0.57 | 89.54  | 7.7E-08 | 1.22  | 0.57 | 0.03 | -0.03 | 0.02 | 0.03    |
| Fasting glucose           | cg06235429 | -0.15 | 0.27 | 0.59 | 57.27  | 1.9E-03 | -0.18 | 0.49 | 0.71 | 0.00  | 0.01 | 0.92    |
| Fasting glucose           | cg06397161 | 0.12  | 0.29 | 0.68 | 71.23  | 3.3E-05 | 0.26  | 0.54 | 0.62 | 0.00  | 0.01 | 0.75    |
| Fasting glucose           | cg06500161 | 0.17  | 0.27 | 0.52 | 60.28  | 8.5E-04 | -0.38 | 0.49 | 0.44 | 0.02  | 0.01 | 0.14    |
| Fasting glucose           | cg08309687 | -0.15 | 0.27 | 0.59 | 68.39  | 8.0E-05 | -0.31 | 0.49 | 0.52 | 0.01  | 0.01 | 0.67    |
| Fasting glucose           | cg08994060 | 0.50  | 0.31 | 0.11 | 106.42 | 1.8E-10 | 0.29  | 0.57 | 0.61 | 0.01  | 0.02 | 0.65    |
| Fasting glucose           | cg11024682 | 0.05  | 0.27 | 0.86 | 59.01  | 1.2E-03 | 0.21  | 0.49 | 0.68 | -0.01 | 0.01 | 0.69    |
| Fasting glucose           | cg11183227 | -0.04 | 0.28 | 0.89 | 74.19  | 1.3E-05 | -0.41 | 0.49 | 0.41 | 0.01  | 0.01 | 0.37    |
| Fasting glucose           | cg11376147 | 0.17  | 0.32 | 0.60 | 89.35  | 8.2E-08 | 0.17  | 0.58 | 0.77 | 0.00  | 0.02 | 1.00    |
| Fasting glucose           | cg13514042 | 0.08  | 0.31 | 0.79 | 78.59  | 3.1E-06 | -0.09 | 0.56 | 0.87 | 0.01  | 0.02 | 0.70    |
| Fasting glucose           | cg14020176 | 0.07  | 0.27 | 0.81 | 72.23  | 2.4E-05 | -0.15 | 0.50 | 0.77 | 0.01  | 0.01 | 0.61    |
| Fasting glucose           | cg14476101 | 0.06  | 0.28 | 0.82 | 72.52  | 2.2E-05 | -0.02 | 0.51 | 0.97 | 0.00  | 0.01 | 0.85    |
| Fasting glucose           | cg19693031 | 0.09  | 0.27 | 0.73 | 62.25  | 4.9E-04 | -0.93 | 0.49 | 0.06 | 0.03  | 0.01 | 3.9E-03 |
| Fasting glucose           | cg25130381 | 0.19  | 0.31 | 0.54 | 103.78 | 4.7E-10 | -0.15 | 0.56 | 0.79 | 0.01  | 0.02 | 0.46    |
| Fasting insulin (adj BMI) | cg00574958 | 0.25  | 0.68 | 0.71 | 32.92  | 4.8E-03 | -3.13 | 2.94 | 0.29 | 0.05  | 0.04 | 0.17    |
| Fasting insulin (adj BMI) | cg01676795 | 0.54  | 0.77 | 0.49 | 57.78  | 6.0E-07 | 8.83  | 2.94 | 0.00 | -0.13 | 0.04 | 1.0E-03 |
| Fasting insulin (adj BMI) | cg02711608 | -0.31 | 0.79 | 0.69 | 59.60  | 3.0E-07 | -1.68 | 3.52 | 0.63 | 0.02  | 0.05 | 0.69    |
| Fasting insulin (adj BMI) | cg04816311 | -0.56 | 0.81 | 0.49 | 69.28  | 6.0E-09 | 2.37  | 3.56 | 0.51 | -0.04 | 0.05 | 0.40    |

SUPPLEMENTARY DATA

|                           |            |       |      |      |        |         |       |      |      |       |      |         |
|---------------------------|------------|-------|------|------|--------|---------|-------|------|------|-------|------|---------|
| Fasting insulin (adj BMI) | cg05778424 | 0.19  | 0.68 | 0.78 | 29.63  | 1.3E-02 | 1.38  | 2.95 | 0.64 | -0.02 | 0.04 | 0.62    |
| Fasting insulin (adj BMI) | cg06235429 | -1.01 | 0.70 | 0.15 | 47.01  | 3.7E-05 | 0.06  | 3.13 | 0.98 | -0.02 | 0.05 | 0.72    |
| Fasting insulin (adj BMI) | cg06397161 | 0.68  | 0.68 | 0.32 | 44.07  | 1.1E-04 | 0.02  | 3.01 | 0.99 | 0.01  | 0.04 | 0.82    |
| Fasting insulin (adj BMI) | cg06500161 | -0.38 | 0.68 | 0.58 | 24.40  | 0.06    | 0.89  | 2.95 | 0.76 | -0.02 | 0.03 | 0.56    |
| Fasting insulin (adj BMI) | cg08309687 | -0.61 | 0.83 | 0.46 | 69.62  | 5.2E-09 | 3.63  | 3.56 | 0.31 | -0.06 | 0.05 | 0.22    |
| Fasting insulin (adj BMI) | cg08994060 | -0.54 | 0.68 | 0.42 | 44.25  | 1.0E-04 | -2.13 | 2.94 | 0.47 | 0.02  | 0.04 | 0.58    |
| Fasting insulin (adj BMI) | cg11024682 | -0.02 | 0.68 | 0.97 | 12.04  | 0.68    | -1.30 | 2.95 | 0.66 | 0.02  | 0.02 | 0.41    |
| Fasting insulin (adj BMI) | cg11183227 | 0.06  | 0.72 | 0.93 | 48.31  | 2.3E-05 | 5.90  | 2.95 | 0.05 | -0.09 | 0.04 | 0.03    |
| Fasting insulin (adj BMI) | cg11376147 | 0.45  | 0.68 | 0.50 | 40.16  | 4.3E-04 | -0.04 | 2.95 | 0.99 | 0.01  | 0.04 | 0.86    |
| Fasting insulin (adj BMI) | cg13514042 | 0.04  | 0.92 | 0.96 | 78.15  | 1.5E-10 | -9.01 | 3.27 | 0.01 | 0.14  | 0.05 | 4.5E-03 |
| Fasting insulin (adj BMI) | cg14020176 | -0.11 | 0.91 | 0.90 | 73.26  | 1.2E-09 | 2.14  | 4.04 | 0.60 | -0.03 | 0.06 | 0.57    |
| Fasting insulin (adj BMI) | cg14476101 | 0.18  | 0.68 | 0.80 | 31.53  | 0.01    | -0.64 | 2.94 | 0.83 | 0.01  | 0.04 | 0.75    |
| Fasting insulin (adj BMI) | cg19693031 | -1.75 | 0.82 | 0.03 | 64.11  | 4.9E-08 | -0.42 | 3.68 | 0.91 | -0.02 | 0.05 | 0.71    |
| Fasting insulin (adj BMI) | cg25130381 | 0.45  | 0.68 | 0.51 | 25.93  | 0.04    | 1.69  | 2.95 | 0.57 | -0.02 | 0.03 | 0.58    |
| Insulin secretion         | cg00574958 | -0.27 | 0.18 | 0.13 | 15.65  | 0.55    | -0.60 | 0.47 | 0.20 | 0.02  | 0.03 | 0.45    |
| Insulin secretion         | cg01676795 | 0.10  | 0.16 | 0.52 | 7.56   | 0.98    | 0.00  | 0.42 | 0.99 | 0.01  | 0.02 | 0.70    |
| Insulin secretion         | cg02711608 | -0.05 | 0.19 | 0.81 | 19.98  | 0.28    | 0.02  | 0.52 | 0.97 | 0.00  | 0.03 | 0.89    |
| Insulin secretion         | cg04816311 | 0.17  | 0.17 | 0.31 | 16.88  | 0.46    | 0.61  | 0.45 | 0.18 | -0.03 | 0.03 | 0.30    |
| Insulin secretion         | cg05778424 | -0.05 | 0.19 | 0.80 | 16.72  | 0.47    | -0.03 | 0.51 | 0.95 | 0.00  | 0.03 | 0.98    |
| Insulin secretion         | cg06235429 | 0.22  | 0.16 | 0.17 | 18.89  | 0.33    | 1.14  | 0.42 | 0.01 | -0.06 | 0.02 | 4.6E-04 |
| Insulin secretion         | cg06397161 | -0.13 | 0.20 | 0.52 | 29.53  | 0.03    | 0.14  | 0.54 | 0.80 | -0.02 | 0.03 | 0.59    |
| Insulin secretion         | cg06500161 | 0.05  | 0.16 | 0.78 | 14.19  | 0.65    | -0.31 | 0.43 | 0.47 | 0.02  | 0.03 | 0.37    |
| Insulin secretion         | cg08309687 | 0.02  | 0.16 | 0.91 | 10.09  | 0.90    | 0.11  | 0.42 | 0.80 | -0.01 | 0.02 | 0.79    |
| Insulin secretion         | cg08994060 | -0.38 | 0.21 | 0.07 | 26.33  | 0.07    | -0.29 | 0.55 | 0.59 | -0.01 | 0.03 | 0.87    |
| Insulin secretion         | cg11024682 | 0.31  | 0.16 | 0.06 | 27.82  | 0.05    | 0.75  | 0.43 | 0.08 | -0.03 | 0.03 | 0.26    |
| Insulin secretion         | cg11183227 | 0.14  | 0.16 | 0.38 | 12.52  | 0.77    | -0.08 | 0.42 | 0.85 | 0.01  | 0.03 | 0.56    |
| Insulin secretion         | cg11376147 | 0.00  | 0.21 | 1.00 | 27.54  | 0.05    | -1.02 | 0.50 | 0.04 | 0.07  | 0.03 | 0.03    |
| Insulin secretion         | cg13514042 | 0.09  | 0.20 | 0.64 | 21.36  | 0.21    | -0.44 | 0.53 | 0.41 | 0.04  | 0.03 | 0.28    |
| Insulin secretion         | cg14020176 | -0.13 | 0.17 | 0.45 | 20.05  | 0.27    | 0.60  | 0.42 | 0.15 | -0.05 | 0.03 | 0.06    |
| Insulin secretion         | cg14476101 | 0.05  | 0.16 | 0.76 | 8.58   | 0.95    | -0.32 | 0.42 | 0.45 | 0.02  | 0.02 | 0.15    |
| Insulin secretion         | cg19693031 | -0.03 | 0.16 | 0.87 | 18.43  | 0.36    | 1.00  | 0.42 | 0.02 | -0.07 | 0.02 | 9.6E-04 |
| Insulin secretion         | cg25130381 | 0.09  | 0.16 | 0.58 | 9.34   | 0.93    | 0.44  | 0.42 | 0.29 | -0.02 | 0.02 | 0.27    |
| Insulin resistance        | cg00574958 | -0.91 | 0.62 | 0.14 | 238.85 | 1.3E-28 | 0.98  | 1.91 | 0.61 | -0.02 | 0.02 | 0.30    |

SUPPLEMENTARY DATA

|                    |            |       |      |      |        |         |       |      |      |       |      |      |
|--------------------|------------|-------|------|------|--------|---------|-------|------|------|-------|------|------|
| Insulin resistance | cg01676795 | 0.26  | 0.61 | 0.66 | 210.47 | 1.4E-23 | 1.37  | 1.89 | 0.47 | -0.01 | 0.02 | 0.54 |
| Insulin resistance | cg02711608 | -0.58 | 0.69 | 0.40 | 272.93 | 8.6E-35 | -1.14 | 2.16 | 0.60 | 0.01  | 0.02 | 0.78 |
| Insulin resistance | cg04816311 | 0.39  | 0.61 | 0.52 | 214.72 | 2.6E-24 | -0.05 | 1.92 | 0.98 | 0.00  | 0.02 | 0.81 |
| Insulin resistance | cg05778424 | 0.52  | 0.59 | 0.38 | 159.10 | 6.1E-15 | -0.15 | 1.83 | 0.93 | 0.01  | 0.02 | 0.66 |
| Insulin resistance | cg06235429 | -0.22 | 0.63 | 0.73 | 228.51 | 9.4E-27 | -0.37 | 1.97 | 0.85 | 0.00  | 0.02 | 0.93 |
| Insulin resistance | cg06397161 | 0.90  | 0.70 | 0.20 | 311.31 | 6.2E-42 | 2.57  | 2.18 | 0.24 | -0.02 | 0.02 | 0.42 |
| Insulin resistance | cg06500161 | 0.44  | 0.59 | 0.46 | 200.51 | 7.5E-22 | 1.14  | 1.83 | 0.53 | -0.01 | 0.02 | 0.68 |
| Insulin resistance | cg08309687 | -0.30 | 0.61 | 0.63 | 210.36 | 1.5E-23 | 0.26  | 1.91 | 0.89 | -0.01 | 0.02 | 0.76 |
| Insulin resistance | cg08994060 | -0.15 | 0.59 | 0.80 | 125.65 | 8.7E-10 | -0.74 | 1.83 | 0.69 | 0.01  | 0.02 | 0.68 |
| Insulin resistance | cg11024682 | 0.99  | 0.59 | 0.09 | 206.64 | 6.6E-23 | 1.37  | 1.83 | 0.45 | 0.00  | 0.02 | 0.82 |
| Insulin resistance | cg11183227 | -0.01 | 0.59 | 0.98 | 180.48 | 1.9E-18 | -1.12 | 1.83 | 0.54 | 0.01  | 0.02 | 0.49 |
| Insulin resistance | cg11376147 | -0.28 | 0.59 | 0.64 | 205.12 | 1.2E-22 | 2.35  | 1.82 | 0.20 | -0.03 | 0.02 | 0.13 |
| Insulin resistance | cg13514042 | 0.52  | 0.65 | 0.43 | 236.40 | 3.7E-28 | -1.72 | 2.01 | 0.39 | 0.02  | 0.02 | 0.24 |
| Insulin resistance | cg14020176 | 0.15  | 0.71 | 0.83 | 294.11 | 1.0E-38 | 0.28  | 2.23 | 0.90 | 0.00  | 0.02 | 0.95 |
| Insulin resistance | cg14476101 | -0.24 | 0.59 | 0.69 | 178.26 | 4.5E-18 | 0.69  | 1.82 | 0.71 | -0.01 | 0.02 | 0.57 |
| Insulin resistance | cg19693031 | -1.33 | 0.73 | 0.07 | 304.97 | 9.5E-41 | -2.42 | 2.28 | 0.29 | 0.01  | 0.02 | 0.61 |
| Insulin resistance | cg25130381 | 1.41  | 0.59 | 0.02 | 189.18 | 6.5E-20 | 1.25  | 1.83 | 0.50 | 0.00  | 0.02 | 0.92 |
| Type 2 diabetes    | cg00574958 | -0.04 | 0.06 | 0.56 | 22.03  | 1.00    | -0.07 | 0.15 | 0.66 | 0.00  | 0.01 | 0.83 |
| Type 2 diabetes    | cg01676795 | 0.10  | 0.06 | 0.11 | 22.89  | 0.99    | 0.01  | 0.15 | 0.94 | 0.01  | 0.02 | 0.50 |
| Type 2 diabetes    | cg02711608 | 0.07  | 0.07 | 0.35 | 25.51  | 0.98    | 0.01  | 0.17 | 0.95 | 0.01  | 0.02 | 0.70 |
| Type 2 diabetes    | cg04816311 | 0.03  | 0.06 | 0.59 | 21.60  | 1.00    | 0.01  | 0.15 | 0.95 | 0.00  | 0.01 | 0.84 |
| Type 2 diabetes    | cg05778424 | 0.08  | 0.06 | 0.17 | 17.59  | 1.00    | 0.05  | 0.14 | 0.71 | 0.00  | 0.01 | 0.77 |
| Type 2 diabetes    | cg06235429 | 0.01  | 0.06 | 0.83 | 22.21  | 0.99    | 0.05  | 0.14 | 0.73 | 0.00  | 0.01 | 0.77 |
| Type 2 diabetes    | cg06397161 | -0.03 | 0.06 | 0.69 | 24.58  | 0.99    | -0.06 | 0.15 | 0.67 | 0.00  | 0.01 | 0.78 |
| Type 2 diabetes    | cg06500161 | 0.06  | 0.06 | 0.34 | 20.50  | 1.00    | 0.19  | 0.14 | 0.17 | -0.02 | 0.01 | 0.28 |
| Type 2 diabetes    | cg08309687 | -0.08 | 0.06 | 0.18 | 18.68  | 1.00    | -0.22 | 0.14 | 0.12 | 0.02  | 0.01 | 0.26 |
| Type 2 diabetes    | cg08994060 | 0.08  | 0.07 | 0.25 | 27.00  | 0.96    | 0.30  | 0.16 | 0.06 | -0.02 | 0.02 | 0.13 |
| Type 2 diabetes    | cg11024682 | 0.00  | 0.07 | 0.95 | 27.30  | 0.96    | 0.05  | 0.15 | 0.72 | -0.01 | 0.02 | 0.67 |
| Type 2 diabetes    | cg11183227 | 0.01  | 0.06 | 0.92 | 19.87  | 1.00    | 0.07  | 0.14 | 0.62 | -0.01 | 0.01 | 0.60 |
| Type 2 diabetes    | cg11376147 | -0.03 | 0.08 | 0.66 | 30.77  | 0.90    | -0.03 | 0.18 | 0.86 | 0.00  | 0.02 | 0.98 |
| Type 2 diabetes    | cg13514042 | -0.07 | 0.08 | 0.38 | 33.15  | 0.83    | -0.01 | 0.18 | 0.95 | -0.01 | 0.02 | 0.72 |
| Type 2 diabetes    | cg14020176 | 0.11  | 0.06 | 0.08 | 23.23  | 0.99    | 0.32  | 0.14 | 0.03 | -0.02 | 0.01 | 0.11 |
| Type 2 diabetes    | cg14476101 | -0.03 | 0.06 | 0.61 | 18.91  | 1.00    | 0.19  | 0.14 | 0.18 | -0.02 | 0.01 | 0.06 |

SUPPLEMENTARY DATA

|                 |            |       |      |      |       |         |       |      |      |       |      |      |
|-----------------|------------|-------|------|------|-------|---------|-------|------|------|-------|------|------|
| Type 2 diabetes | cg19693031 | -0.08 | 0.07 | 0.28 | 26.34 | 0.97    | -0.02 | 0.16 | 0.91 | -0.01 | 0.02 | 0.69 |
| Type 2 diabetes | cg25130381 | 0.01  | 0.06 | 0.91 | 16.17 | 1.00    | 0.13  | 0.14 | 0.37 | -0.01 | 0.01 | 0.27 |
| WHR (adj. BMI)  | cg00574958 | -0.07 | 0.26 | 0.78 | 67.13 | 1.8E-03 | -1.28 | 1.31 | 0.33 | 0.03  | 0.04 | 0.34 |
| WHR (adj. BMI)  | cg01676795 | 0.02  | 0.26 | 0.93 | 65.34 | 2.8E-03 | 1.14  | 1.31 | 0.38 | -0.03 | 0.04 | 0.38 |
| WHR (adj. BMI)  | cg02711608 | -0.01 | 0.28 | 0.98 | 70.11 | 8.2E-04 | -1.28 | 1.39 | 0.35 | 0.04  | 0.04 | 0.35 |
| WHR (adj. BMI)  | cg04816311 | -0.25 | 0.25 | 0.31 | 61.98 | 0.01    | 1.29  | 1.22 | 0.29 | -0.04 | 0.03 | 0.20 |
| WHR (adj. BMI)  | cg05778424 | 0.00  | 0.24 | 0.99 | 49.18 | 0.09    | -0.02 | 1.20 | 0.99 | 0.00  | 0.03 | 0.99 |
| WHR (adj. BMI)  | cg06235429 | 0.15  | 0.24 | 0.53 | 38.27 | 0.41    | -1.38 | 1.21 | 0.25 | 0.04  | 0.03 | 0.10 |
| WHR (adj. BMI)  | cg06397161 | 0.09  | 0.24 | 0.70 | 59.73 | 0.01    | -0.40 | 1.20 | 0.74 | 0.01  | 0.03 | 0.68 |
| WHR (adj. BMI)  | cg06500161 | 0.09  | 0.24 | 0.70 | 56.91 | 0.02    | -1.06 | 1.20 | 0.38 | 0.03  | 0.03 | 0.31 |
| WHR (adj. BMI)  | cg08309687 | -0.08 | 0.25 | 0.73 | 59.58 | 0.01    | 0.19  | 1.25 | 0.88 | -0.01 | 0.03 | 0.82 |
| WHR (adj. BMI)  | cg08994060 | 0.15  | 0.25 | 0.55 | 61.49 | 0.01    | -1.44 | 1.22 | 0.24 | 0.04  | 0.03 | 0.19 |
| WHR (adj. BMI)  | cg11024682 | 0.13  | 0.24 | 0.60 | 57.59 | 0.02    | 1.39  | 1.20 | 0.25 | -0.04 | 0.03 | 0.28 |
| WHR (adj. BMI)  | cg11183227 | -0.09 | 0.28 | 0.76 | 78.04 | 9.3E-05 | -0.05 | 1.44 | 0.97 | 0.00  | 0.04 | 0.98 |
| WHR (adj. BMI)  | cg11376147 | 0.16  | 0.24 | 0.51 | 53.07 | 0.04    | -1.70 | 1.20 | 0.16 | 0.05  | 0.03 | 0.09 |
| WHR (adj. BMI)  | cg13514042 | -0.17 | 0.24 | 0.48 | 52.92 | 0.04    | 0.82  | 1.20 | 0.50 | -0.03 | 0.03 | 0.40 |
| WHR (adj. BMI)  | cg14020176 | -0.12 | 0.24 | 0.62 | 52.57 | 0.05    | 1.47  | 1.21 | 0.22 | -0.04 | 0.03 | 0.16 |
| WHR (adj. BMI)  | cg14476101 | 0.10  | 0.24 | 0.68 | 37.83 | 0.43    | 0.29  | 1.20 | 0.81 | -0.01 | 0.03 | 0.84 |
| WHR (adj. BMI)  | cg19693031 | -0.28 | 0.24 | 0.24 | 57.56 | 0.02    | -2.27 | 1.20 | 0.06 | 0.06  | 0.03 | 0.08 |
| WHR (adj. BMI)  | cg25130381 | 0.35  | 0.24 | 0.15 | 45.72 | 0.15    | 0.65  | 1.21 | 0.59 | -0.01 | 0.03 | 0.77 |

SUPPLEMENTARY DATA

**Supplementary Table S11. Gene annotations for the top 18 T2DM-associated MVPs.**

| MVP (CpG ID) | Chr | Position  | P-value | Gene            | Gene position | Full gene name                                                                                                       | Gene function                                                                                                                                                                                                                                                                                                                                                        | Associated disorders                                                                                                                                                                                                                                                                                            |
|--------------|-----|-----------|---------|-----------------|---------------|----------------------------------------------------------------------------------------------------------------------|----------------------------------------------------------------------------------------------------------------------------------------------------------------------------------------------------------------------------------------------------------------------------------------------------------------------------------------------------------------------|-----------------------------------------------------------------------------------------------------------------------------------------------------------------------------------------------------------------------------------------------------------------------------------------------------------------|
| cg19693031   | 1   | 144152909 | 2.7E-21 | <i>TXNIP</i>    | 3'UTR         | thioredoxin interacting protein                                                                                      | The encoded protein inhibits the antioxidative function of thioredoxin resulting in the accumulation of reactive oxygen species and cellular stress. This protein also regulates cellular metabolism and endoplasmic reticulum (ER) stress, and may also function as a tumor suppressor.                                                                             |                                                                                                                                                                                                                                                                                                                 |
| cg06500161   | 21  | 42529656  | 6.4E-14 | <i>ABCG1</i>    | Body          | ATP-binding cassette, sub-family G (WHITE), member 1                                                                 | The encoded protein is a member of the White subfamily of ATP-binding cassette (ABC) transporters, and is involved in macrophage cholesterol and phospholipids transport, and may regulate cellular lipid homeostasis in other cell types.                                                                                                                           | <b>Tangier disease:</b> Characterized by low levels of high-density lipoprotein cholesterol (HDL) in the blood and accordingly with moderately increased risk of cardiovascular disease.<br><b>Autosomal Recessive Nonsyndromic Deafness</b>                                                                    |
| cg14476101   | 1   | 120057515 | 2.8E-10 | <i>PHGDH</i>    | Body          | phosphoglycerate dehydrogenase                                                                                       | The encoded enzyme is involved in the early steps of L-serine synthesis in animal cells. L-serine is required for D-serine and other amino acid synthesis.                                                                                                                                                                                                           | <b>Neu-Laxova Syndrome 1:</b> An autosomal recessive lethal multiple malformation syndrome.<br><b>Phosphoglycerate Dehydrogenase Deficiency:</b> characterized by microcephaly; impaired development of physical reactions, movements, and speech (psychomotor retardation); and recurrent seizures (epilepsy). |
| cg14020176   | 17  | 70276580  | 3.3E-10 | <i>SLC9A3R1</i> | 3'UTR         | solute carrier family 9, subfamily A (NHE3, cation proton antiporter 3), member 3 regulator 1                        | Encodes a sodium/hydrogen exchanger regulatory cofactor, which regulates: the cystic fibrosis transmembrane conductance regulator, and G-protein coupled receptors such as the beta2-adrenergic receptor and the parathyroid hormone 1 receptor. Interacts with proteins that function as linkers between integral membrane and cytoskeletal proteins.               | <b>Nephrolithiasis/osteoporosis, hypophosphatemic, 2:</b> Characterized by decreased renal phosphate absorption, renal phosphate wasting, hypophosphatemia, hyperphosphaturia, hypercalciuria, nephrolithiasis and osteoporosis.                                                                                |
| cg11024682   | 17  | 17670819  | 6.0E-10 | <i>SREBF1</i>   | Body          | sterol regulatory element binding transcription factor 1 [alias: sterol regulatory element binding protein 1; SREBP1 | Encodes a transcription factor that binds to the sterol regulatory element-1 (SRE1), which is a decamer flanking the low density lipoprotein receptor gene and some genes involved in sterol biosynthesis. SREBP1 and SREBP2 (600481) are structurally related proteins that control cholesterol homeostasis by stimulating transcription of sterol-regulated genes. | This gene is located within the Smith-Magenis syndrome region (a developmental disorder characterised by intellectual disability, delayed speech and language skills, distinctive facial features, sleep disturbances, and behavioral problems).                                                                |
| cg06397161   | 22  | 38090005  | 4.5E-09 | <i>SYNGR1</i>   | Body;TSS200   | synaptogyrin 1                                                                                                       | Encodes an integral membrane protein associated with presynaptic vesicles in neuronal cells. The exact function is unclear, but may function in synaptic plasticity.                                                                                                                                                                                                 |                                                                                                                                                                                                                                                                                                                 |



SUPPLEMENTARY DATA

|            |    |          |         |                |                    |                                                                             |                                                                                                                                                                                                                                                                               |                                                                                                                                                                                                                                                   |
|------------|----|----------|---------|----------------|--------------------|-----------------------------------------------------------------------------|-------------------------------------------------------------------------------------------------------------------------------------------------------------------------------------------------------------------------------------------------------------------------------|---------------------------------------------------------------------------------------------------------------------------------------------------------------------------------------------------------------------------------------------------|
| cg00574958 | 11 | 68364198 | 5.2E-09 | <i>CPT1A</i>   | 5'UTR              | carnitine palmitoyltransferase 1A (liver)                                   | Initiates mitochondrial oxidation of long-chain fatty acids. CPT I is the key enzyme in the carnitine-dependent transport across the mitochondrial inner membrane. Its deficiency results in a decreased rate of fatty acid beta-oxidation.                                   | <b>CPT deficiency, hepatic, type IA:</b> An autosomal recessive metabolic disorder of long-chain fatty acid oxidation characterized by severe episodes of hypoketotic hypoglycemia usually occurring after fasting or illness.                    |
| cg06235429 | 11 | 67129690 | 5.5E-09 | <i>NDUFV1</i>  | TSS1500            | NADH dehydrogenase (ubiquinone) flavoprotein 1, 51kDa                       | Encodes a subunit of mitochondrial NADH:ubiquinone oxidoreductase complex I; a large complex that liberates electrons from NADH and channels them to ubiquinone. This subunit carries the NADH-binding site as well as flavin mononucleotide (FMN)- and Fe-S-binding sites.   | <b>Mitochondrial Complex I Deficiency:</b> The most common enzymatic defect of the oxidative phosphorylation disorders. It causes a wide range of clinical disorders, including myopathies, encephalomyopathies, and neurodegenerative disorders. |
| cg05778424 | 17 | 52524507 | 7.4E-09 | <i>AKAP1</i>   | 5'UTR              | A kinase (PRKA) anchor protein 1                                            | The encoded protein binds to type I and type II regulatory subunits of protein kinase A (PKA) and anchors them to the mitochondrion. This protein is speculated to be involved in the cAMP-dependent signal transduction pathway.                                             |                                                                                                                                                                                                                                                   |
| cg11376147 | 11 | 57017774 | 1.3E-08 | <i>SLC43A1</i> | Body               | solute carrier family 43, member 1                                          | Member of the system L family of plasma membrane carrier proteins that transports large neutral amino acids                                                                                                                                                                   |                                                                                                                                                                                                                                                   |
| cg04816311 | 7  | 1033176  | 1.7E-08 | <i>C7orf50</i> | Body               | chromosome 7 open reading frame 50 (194 aa)                                 |                                                                                                                                                                                                                                                                               |                                                                                                                                                                                                                                                   |
| cg02711608 | 19 | 51979804 | 4.5E-08 | <i>SLC1A5</i>  | 1stExon;5'UTR;Body | solute carrier family 1 (neutral amino acid transporter), member 5 (541 aa) | Encodes a sodium-dependent neutral amino acid transporter that can act as a receptor for RD114/type D retrovirus                                                                                                                                                              |                                                                                                                                                                                                                                                   |
| cg08309687 | 21 | 34242466 | 4.5E-08 | -              | -                  |                                                                             |                                                                                                                                                                                                                                                                               |                                                                                                                                                                                                                                                   |
| cg13514042 | 7  | 1158728  | 4.5E-08 | -              | -                  |                                                                             |                                                                                                                                                                                                                                                                               |                                                                                                                                                                                                                                                   |
| cg08994060 | 10 | 6254032  | 5.2E-08 | <i>PFKFB3</i>  | Body               | 6-phosphofructo-2-kinase/fructose-2,6-biphosphatase 3                       | The encoded protein catalyses the synthesis and degradation of fructose-2,6-bisphosphate, a regulatory molecule that controls glycolysis in eukaryotes. It regulates cyclin-dependent kinase 1, linking glucose metabolism to cell proliferation and survival in tumor cells. |                                                                                                                                                                                                                                                   |

SUPPLEMENTARY DATA

|            |    |          |         |               |      |                                                                                   |                                                                                                                                                                                                                                                        |                                                                                                                                                                                                                                                                                                                                                                                                                                                                                                                                                                                                                                                                                                                                                                                                                                                                         |
|------------|----|----------|---------|---------------|------|-----------------------------------------------------------------------------------|--------------------------------------------------------------------------------------------------------------------------------------------------------------------------------------------------------------------------------------------------------|-------------------------------------------------------------------------------------------------------------------------------------------------------------------------------------------------------------------------------------------------------------------------------------------------------------------------------------------------------------------------------------------------------------------------------------------------------------------------------------------------------------------------------------------------------------------------------------------------------------------------------------------------------------------------------------------------------------------------------------------------------------------------------------------------------------------------------------------------------------------------|
| cg01676795 | 7  | 75424284 | 6.5E-08 | <i>POR</i>    | Body | P450 (cytochrome) oxidoreductase                                                  | Encodes an endoplasmic reticulum membrane oxidoreductase with an FAD-binding domain and a flavodoxin-like domain. The protein binds two cofactors, FAD and FMN, which allow it to donate electrons directly from NADPH to all microsomal P450 enzymes. | <b>Antley-Bixler syndrome with genital anomalies and disordered steroidogenesis:</b> a rare craniosynostosis syndrome characterized by radiohumeral synostosis. Other features include midface hypoplasia, choanal stenosis or atresia, multiple joint contractures, visceral anomalies (genitourinary system), and impaired steroidogenesis (specific to POR mutations).<br><b>Disordered steroidogenesis due to cytochrome P450 oxidoreductase:</b> A rare variant of congenital adrenal hyperplasia, due to apparent combined deficiency of P450C17 and P450C21 and accumulation of steroid metabolites. Affected girls are born with ambiguous genitalia, indicating intrauterine androgen excess. After birth, however, virilization does not progress and amounts of circulating androgens are low or normal. Affected boys are sometimes born undermasculinized. |
| cg25130381 | 1  | 27313308 | 6.7E-08 | <i>SLC9A1</i> | Body | solute carrier family 9, subfamily A (NHE1, cation proton antiporter 1), member 1 | Encodes a Na <sup>+</sup> /H <sup>+</sup> antiporter, a plasma membrane transporter that is expressed in the kidney and intestine. Regulates pH homeostasis, cell migration and cell volume.                                                           | <b>Lichtenstein-Knorr syndrome:</b> An autosomal recessive neurologic disorder characterized by postnatal onset of severe progressive sensorineural hearing loss and progressive cerebellar ataxia.<br><b>Myocardial Stunning:</b> A state when some section of the myocardium (corresponding to area of a major coronary occlusion) shows a form of contractile abnormality.                                                                                                                                                                                                                                                                                                                                                                                                                                                                                           |
| cg11183227 | 15 | 89256411 | 7.0E-08 | <i>MAN2A2</i> | Body | mannosidase, alpha, class 2A, member 2                                            | The encoded protein catalyzes the first committed step in the biosynthesis of complex N-glycans. It controls conversion of high mannose to complex N-glycans; the final hydrolytic step in the N-glycan maturation pathway.                            |                                                                                                                                                                                                                                                                                                                                                                                                                                                                                                                                                                                                                                                                                                                                                                                                                                                                         |
